# Supplementary material for: Z-Schematic and visible-light-driven CO2 reduction using H2O as an electron donor by a particulate mixture of a Ru-complex/(CuGa)1−xZn2xS2 hybrid catalyst, BiVO4 and an electron mediator
Source: Royal Society of Chemistry journal article supplement (doi:10.1039/c8cc05505j), 2018-01-01
Supplement: c8cc05505j1.pdf [file c8cc05505j1.pdf]

Electronic Supplementary Information (ESI) for

**Z-schematic and visible-light-driven CO<sub>2</sub> reduction using H<sub>2</sub>O as an electron donor by particulate mixture of Ru-complex/(CuGa)<sub>1-x</sub>Zn<sub>2x</sub>S<sub>2</sub> hybrid catalyst, BiVO<sub>4</sub> and electron mediator**

Tomiko M. Suzuki,<sup>\*a</sup> Shunya Yoshino,<sup>b</sup> Tomoaki Takayama,<sup>b</sup> Akihide Iwase,<sup>b</sup> Akihiko Kudo,<sup>\* b</sup> and Takeshi Morikawa<sup>a</sup>

<sup>a</sup> Toyota Central R&D Labs. Inc., 41-1, Yokomichi, Nagakute, Aichi 480-1192, Japan

<sup>b</sup> Tokyo University of Science, Department of Applied Chemistry, 1-3 Kagurazaka, Shinjuku-ku, Tokyo 162-8601, Japan

**Experimental section**

**Preparation of metal sulfide semiconductor**

(CuGa)<sub>1-x</sub>Zn<sub>2x</sub>S<sub>2</sub> solid solutions with various composition ( $x=0, 0.2, 0.5, 0.5, 0.7,$  and  $0.9$ ) were synthesized by solid-state reaction according to a previously reported method.<sup>1</sup> CuS<sub>2</sub> (Kojundo Chemical Laboratory, 99%), Ga<sub>2</sub>S<sub>3</sub> (Kojundo Chemical Laboratory, 99%), and ZnS (Kojundo Chemical Laboratory, 99.999%) were mixed using an agate mortar in the ratio of Cu/Ga/Zn=(1-x): 1.2 (1-x): 1.1 (1-x): 2x. The mixture was sealed in a quartz ampule after evacuation and then calcined at 1073 K for 10 h.

**Preparation of BiVO<sub>4</sub> photocatalyst**

BiVO<sub>4</sub> was prepared by a liquid-solid state reaction as previously reported.<sup>2</sup> 20 mmol of

$\text{Bi}(\text{NO}_3)_3 \cdot 5\text{H}_2\text{O}$  and 10 mmol of  $\text{V}_2\text{O}_5$  were stirred in  $0.5 \text{ mol L}^{-1}$  of aqueous nitric acid solution (100 mL) for 72 h. The  $\text{BiVO}_4$  powder obtained was collected by filtration and washed with distilled water before drying.

### **Synthesis of the Ru-complex**

$[\text{Ru}(4,4'\text{-diphosphonate-2,2'}\text{-bipyridine})(\text{CO})_2\text{Cl}_2]$  ( $[\text{Ru}(\text{dpbpy})]$ ) was synthesized according to a previously reported method.<sup>3</sup>

### **Preparation of $[\text{Ru-dpbpy}]/(\text{CuGa})_{1-x}\text{Zn}_{2x}\text{S}_2$ hybrid photocatalysts**

Hybrid photocatalysts consisting of a Ru-complex  $[\text{Ru}(\text{dpbpy})]$  and a metal sulfide semiconductor  $(\text{CuGa})_{1-x}\text{Zn}_{2x}\text{S}_2$  were prepared by adsorption of the Ru-complex in methanol solution according to a previous report.<sup>2</sup> UV/vis absorption spectra of the solutions after filtration were acquired using a UV/vis spectrophotometer (Shimadzu UV-3600) and the amount of  $[\text{Ru}(\text{dpbpy})]$  adsorbed on  $(\text{CuGa})_{1-x}\text{Zn}_{2x}\text{S}_2$  was calculated from each spectrum.

### **Synthesis of the Co-complex**

$[\text{Co}(2,2':6,6'\text{-terpyridine})_2](\text{NO}_3)_2$  ( $[\text{Co}(\text{tpy})_2](\text{NO}_3)_2$ ) was synthesized as follows. 1.5 mmol of  $\text{Co}(\text{NO}_3)_2 \cdot 6\text{H}_2\text{O}$  (Wako Pure Chemical Industry) and 3.0 mmol of 2,2':6,6'-terpyridine (Tokyo Chemical Industry) were dissolved in methanol solution, which was then stirred at room-temperature for 2 h. The solution changed color to dark brown and was then evaporated to dryness. The residue was recrystallized from methanol and diethyl ether.

## **Characterization**

The crystal structures of the photocatalysts were analyzed using X-ray diffraction (XRD; Rigaku, Ultima IV) with Cu K $\alpha$  radiation at 40 kV and 40 mA. Diffuse reflection spectra were obtained using a UV-vis-NIR spectrometer (JASCO, V-780) and were converted from reflectance to absorbance by the Kubelka-Munk method. X-ray photoelectron spectroscopy (XPS; Ulvac-Phi Quantera SXM) measurements were conducted with monochromated Al K $\alpha$  radiation.

## **Z-schematic photocatalytic CO<sub>2</sub> reduction by the test tube method**

Z-schematic photocatalytic CO<sub>2</sub> reduction was conducted according to a previously reported test tube method.<sup>4-5</sup> Photocatalytic activity was measured at ambient pressure under CO<sub>2</sub> in 8 mL Pyrex test tubes containing an aqueous solution (4 mL) of 0.02 mmol L<sup>-1</sup>[Co(tpy)<sub>2</sub>]<sup>2+</sup> and the [Ru(dpby)]/(CuGa)<sub>1-x</sub>Zn<sub>2x</sub>S<sub>2</sub> hybrid photocatalyst and BiVO<sub>4</sub> photocatalyst (16 mg in total). After purging with CO<sub>2</sub> for 15 min, the suspensions were irradiated in a rotating apparatus using a 500 W Xe lamp (Ushio UXL-500SX) equipped with filters to produce visible-light in the range of (390 <  $\lambda$   $\leq$  750 nm at 31 mW/cm<sup>2</sup>) for a predetermined time at room temperature, in the same manner as reported in a previous study.<sup>4-5</sup> The amount of product obtained was determined from gas chromatography (Shimadzu, GC-14A) and ion-exchange chromatography (Dionex, ICS-2000) measurements. More than three runs were performed to obtain average values.

## **Isotope analysis**

Isotope experiments for Z-schematic CO<sub>2</sub> reduction were conducted using <sup>13</sup>CO<sub>2</sub> (99

at%  $^{13}\text{C}$ , ISOTECH) and  $\text{H}_2^{18}\text{O}$  ( $\geq 98$  at%  $^{18}\text{O}$ , Taiyo Nippon Sanso). The obtained  $\text{H}^{13}\text{COO}^-$  was analyzed using an ion chromatograph interfaced with a time-of-flight mass spectrometer (IC-TOFMS; JEOL JMS-T100LP).<sup>6</sup>  $^{13}\text{CO}$  and  $^{18}\text{O}_2$  obtained by catalytic reaction using  $^{13}\text{CO}_2$  and  $\text{H}_2^{18}\text{O}$ , respectively, were detected using gas chromatography-mass spectrometry (GC-MS; 6890 and 1973, Agilent Technologies, Inc.).<sup>6</sup>

### **Z-schematic photocatalytic $\text{CO}_2$ reduction by $\text{CO}_2$ flow system**

To confirm  $\text{O}_2$  generation, Z-schematic  $\text{CO}_2$  reduction was conducted using a batch-type cell under  $\text{CO}_2$  gas flow according to a previously reported method.<sup>7-8</sup>  $[\text{Ru}(\text{dpbpy})]/(\text{CuGa})_{0.3}\text{Zn}_{1.4}\text{S}_2$  (0.4 g) and  $\text{BiVO}_4$  (0.2 g) photocatalysts were dispersed in  $0.25 \text{ mol L}^{-1} \text{ NaHCO}_3$  and  $0.02 \text{ mmol L}^{-1} [\text{Co}(\text{tpy})_2]^{2+}$  aqueous solution (150 mL) in a top irradiation cell with a Pyrex window. 1 atm of  $\text{CO}_2$  gas (99.995%) was bubbled into the suspension at a flow rate of ca.  $15 \text{ mL min}^{-1}$ . The light source was a 300 W Xe-lamp with cut-off filters ( $\lambda > 420 \text{ nm}$ ). The measurement was conducted after pre-irradiation. Products in the gas and liquid phases were analyzed using a gas chromatography (Shimadzu, GC-8A, MS-5A, thermal conductivity detector, Ar carrier for  $\text{H}_2$  and  $\text{O}_2$ ; GC-8A, MS-13X, flame ionization detector with a methanizer,  $\text{N}_2$  carrier for CO) and ion-exchange chromatography (Dionex, ICS-2000), respectively.

## Results

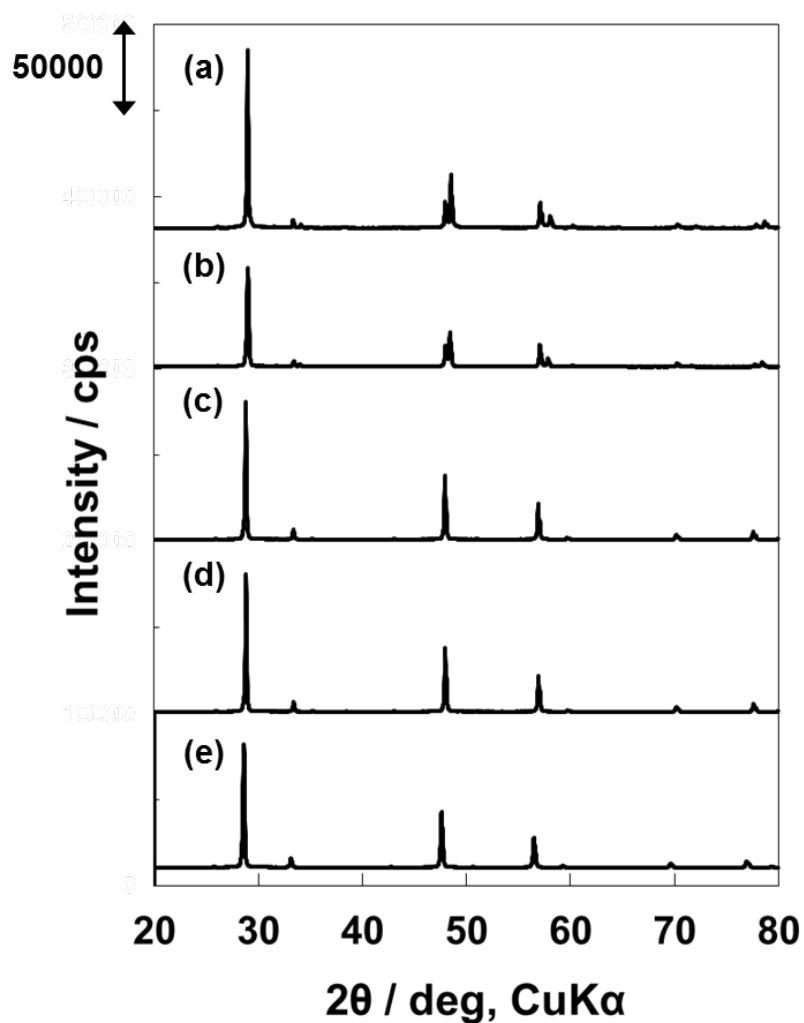

**Fig. S1** XRD patterns of  $(\text{CuGa})_{1-x}\text{Zn}_{2x}\text{S}_2$  prepared by solid-state reaction at 1073 K;  $x$  = (a) 0, (b) 0.2, (c) 0.5, (d) 0.7, and (e) 0.9. 10% excess  $\text{Ga}_2\text{S}_3$  was added to the starting materials for all samples during synthesis according to the previously reported method.<sup>1</sup>

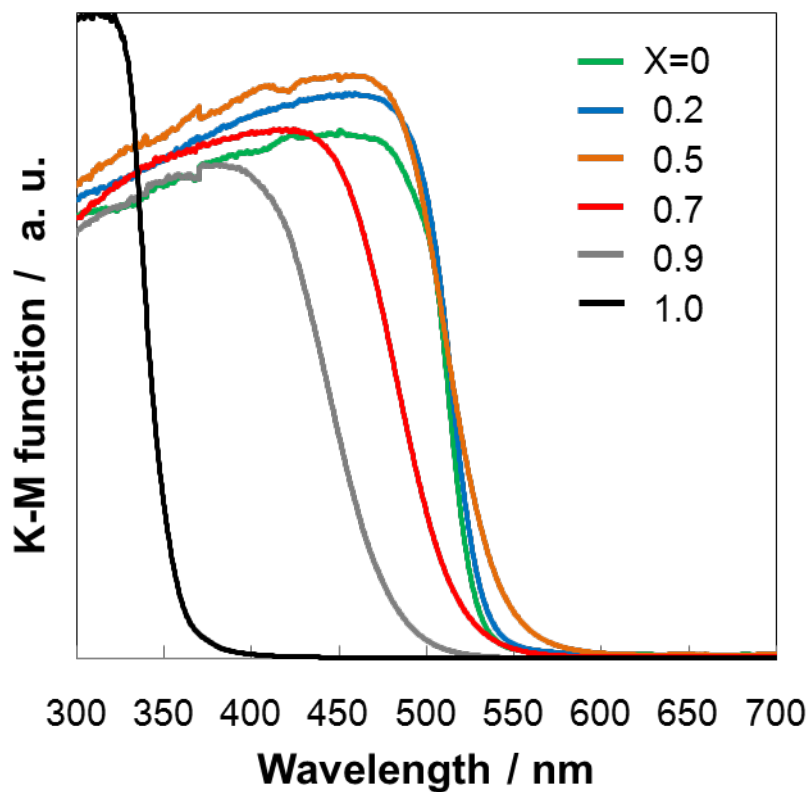

**Fig. S2** UV-vis diffuse reflectance spectra of various  $(\text{CuGa})_{1-x}\text{Zn}_{2x}\text{S}_2$ . Diffuse reflectance spectra were obtained with a UV-vis-NIR spectrometer (JASCO, V-780) equipped with an integrating sphere and were converted from reflection to absorbance by the Kubelka-Munk method.

**Table S1** Band gaps (BGs) of various  $(\text{CuGa})_{1-x}\text{Zn}_{2x}\text{S}_2$  estimated from UV-vis diffuse reflectance spectra

| x                | Chemical composition                           | Crystal phase | BG (eV) |
|------------------|------------------------------------------------|---------------|---------|
| 0                | $\text{CuGaS}_2$                               | chalcopyrite  | 2.33    |
| 0.2              | $(\text{CuGa})_{0.8}\text{Zn}_{0.4}\text{S}_2$ | chalcopyrite  | 2.30    |
| 0.5              | $(\text{CuGa})_{0.5}\text{ZnS}_2$              | zincblende    | 2.24    |
| 0.7              | $(\text{CuGa})_{0.3}\text{Zn}_{1.4}\text{S}_2$ | zincblende    | 2.36    |
| 0.9              | $(\text{CuGa})_{0.1}\text{Zn}_{1.8}\text{S}_2$ | zincblende    | 2.54    |
| 1.0 <sup>a</sup> | $\text{ZnS}$                                   | zincblende    | 3.50    |

<sup>a</sup> Quoted from previous report<sup>5</sup>

**Table S2** Structure of metal-complex [Ru(dpbbpy)] and amount of [Ru(dpbbpy)] adsorbed onto  $(\text{CuGa})_{1-x}\text{Zn}_{2x}\text{S}_2$

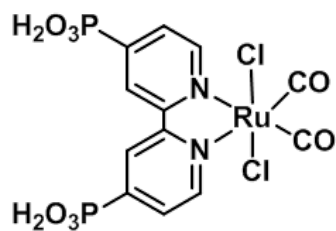

**[Ru(dpbbpy)]**

| x in $(\text{CuGa})_{1-x}\text{Zn}_{2x}\text{S}_2$ | [Ru(dpbbpy)] content (wt%) |
|----------------------------------------------------|----------------------------|
| 0.0                                                | 0.08                       |
| 0.2                                                | 0.08                       |
| 0.5                                                | 0.06                       |
| 0.7                                                | 0.03                       |
| 0.9                                                | 0.03                       |



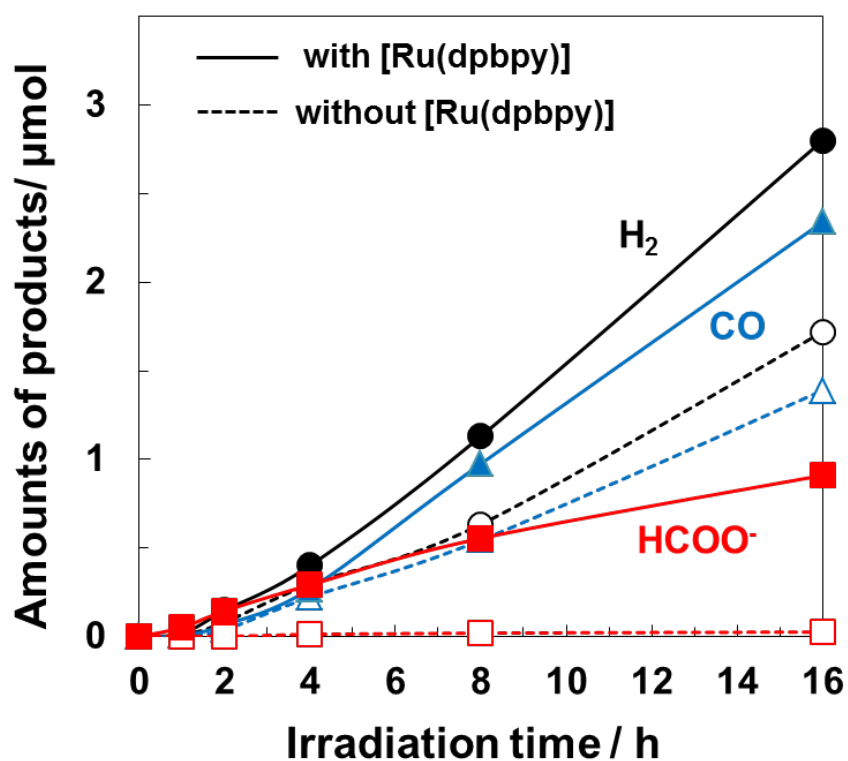

**Fig. S3** Effect on Ru-complex catalyst using  $(\text{CuGa})_{0.3}\text{Zn}_{1.4}\text{S}_2$  photocatalyst for Z-schematic  $\text{CO}_2$  reduction in aqueous solution under visible light irradiation.

Photocatalyst: 10.7 mg  $[\text{Ru}(\text{dpbpy})]$  (0.03 wt%)/ $(\text{CuGa})_{0.3}\text{Zn}_{1.4}\text{S}_2$  or  $(\text{CuGa})_{0.3}\text{Zn}_{1.4}\text{S}_2$ , 5.3 mg  $\text{BiVO}_4$ ; reactant solution:  $0.02 \text{ mmol L}^{-1}$   $[(\text{Co}(\text{tpy})_2)^{2+}]$  containing  $0.25 \text{ mol L}^{-1}$   $\text{NaHCO}_3$  aqueous solution (4 mL); light source: 500 W Xe lamp with a filter ( $390 < \lambda \leq 750 \text{ nm}$ ); reactor: Pyrex test tube (8 mL).

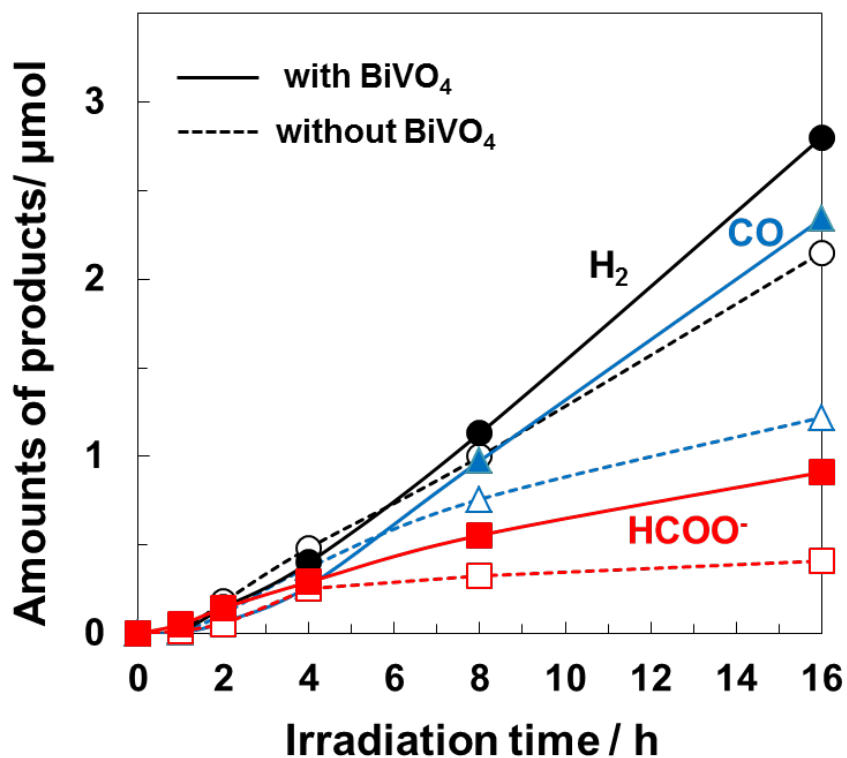

**Fig. S4** Effect of BiVO<sub>4</sub> on Z-schematic CO<sub>2</sub> reduction in aqueous solution under visible light irradiation. Photocatalyst: 10.7 mg [Ru(dpby)] (0.03 wt%)/(CuGa)<sub>0.3</sub>Zn<sub>1.4</sub>S<sub>2</sub> and/or 5.3 mg BiVO<sub>4</sub>; reactant solution: 0.02 mmol L<sup>-1</sup> [(Co(tpy)<sub>2</sub>)<sup>2+</sup> containing 0.25 mol L<sup>-1</sup> NaHCO<sub>3</sub> aqueous solution (4 mL); light source: 500 W Xe lamp with a filter (390 < λ ≤ 750 nm); reactor: Pyrex test tube (8 mL).

**Table S3** Z-schematic CO<sub>2</sub> reduction using Ru-complex ([Ru(dpbpy)]/(CuGa)<sub>0.5</sub>ZnS<sub>2</sub> hybrid CO<sub>2</sub>-reduction photocatalyst and BiVO<sub>4</sub> O<sub>2</sub>-evolving photocatalyst containing 0.02 mmol L<sup>-1</sup> [Co(tpy)<sub>2</sub>]<sup>2+</sup> in various aqueous solutions under visible light irradiation<sup>a</sup>

| Entry | [Ru(dpbpy)]<br>content<br>(wt%) | Reactant aqueous solution                                                     |                 |                                                                             | Amount of products (μmol) |                          |                                         |
|-------|---------------------------------|-------------------------------------------------------------------------------|-----------------|-----------------------------------------------------------------------------|---------------------------|--------------------------|-----------------------------------------|
|       |                                 | Electrolyte<br>(0.1 mol L <sup>-1</sup> )                                     | pH <sup>b</sup> | [Co(tpy) <sub>2</sub> ] <sup>2+</sup><br>content<br>(mmol L <sup>-1</sup> ) | H <sub>2</sub>            | CO<br>(TON) <sup>c</sup> | HCOO <sup>-</sup><br>(TON) <sup>c</sup> |
| S1    | 0.00                            | none                                                                          | 4.3             | 0.02                                                                        | 1.37                      | 0.20                     | 0.03                                    |
| S2    | 0.06                            | none                                                                          | 4.3             | 0.02                                                                        | 0.71                      | 0.16 (0)                 | 0.03(0)                                 |
| S3    | 0.06                            | none                                                                          | 4.3             | 0.00                                                                        | 1.45                      | 0.01                     | 0.00                                    |
| S4    | 0.00                            | K <sub>2</sub> HPO <sub>4</sub> -KH <sub>2</sub> PO <sub>4</sub> <sup>d</sup> | 6.3             | 0.02                                                                        | 0.46                      | 0.23                     | 0.04                                    |
| S5    | 0.06                            | K <sub>2</sub> HPO <sub>4</sub> -KH <sub>2</sub> PO <sub>4</sub> <sup>d</sup> | 6.3             | 0.02                                                                        | 0.44                      | 0.23 (0)                 | 0.06 (1)                                |
| S6    | 0.00                            | K <sub>2</sub> SO <sub>4</sub>                                                | 4.8             | 0.02                                                                        | 0.62                      | 0.16                     | 0.03                                    |
| S7    | 0.06                            | K <sub>2</sub> SO <sub>4</sub>                                                | 4.8             | 0.02                                                                        | 1.03                      | 0.16 (0)                 | 0.05 (1)                                |
| S8    | 0.00                            | NaHCO <sub>3</sub>                                                            | 6.8             | 0.02                                                                        | 1.51                      | 1.03                     | 0.04                                    |
| S9    | 0.06                            | NaHCO <sub>3</sub>                                                            | 6.8             | 0.02                                                                        | 1.14                      | 1.12 (5)                 | 0.20 (19)                               |
| S10   | 0.06                            | NaHCO <sub>3</sub>                                                            | 6.8             | 0.00                                                                        | 1.66                      | 0.15                     | 0.14                                    |
| S11   | 0.00                            | KHCO <sub>3</sub>                                                             | 6.9             | 0.02                                                                        | 2.04                      | 1.17                     | 0.04                                    |
| S12   | 0.06                            | KHCO <sub>3</sub>                                                             | 6.9             | 0.02                                                                        | 1.31                      | 0.97 (0)                 | 0.20 (19)                               |
| S13   | 0.00                            | Na <sub>2</sub> CO <sub>3</sub>                                               | 7.1             | 0.02                                                                        | 2.75                      | 0.98                     | 0.05                                    |
| S14   | 0.06                            | Na <sub>2</sub> CO <sub>3</sub>                                               | 7.1             | 0.02                                                                        | 1.60                      | 0.74                     | 0.10 (3)                                |

<sup>a</sup> Photocatalyst: 8 mg each; reactant solution: 4 mL; light source: 500 W Xe lamp with a filter (390 < λ ≤ 750 nm) for 16 h, reactor: Pyrex test tube (8 mL).

<sup>b</sup> After CO<sub>2</sub> bubbling for 10 min.

<sup>c</sup> Turnover numbers (TONs) were calculated based on the amount of [Ru(dpbpy)] after detection of the HCOOH or CO amount without [Ru(dpbpy)].

<sup>d</sup> Concentration 50 mmol L<sup>-1</sup> each.

**Table S4** Z-schematic CO<sub>2</sub> reduction using Ru-complex ([Ru(dpbpy)]/(CuGa)<sub>0.3</sub>Zn<sub>1.4</sub>S<sub>2</sub> hybrid CO<sub>2</sub>-reduction photocatalyst and BiVO<sub>4</sub> O<sub>2</sub>-evolving photocatalyst containing 0.02 mmol L<sup>-1</sup> mediator in 0.25 mol L<sup>-1</sup> NaHCO<sub>3</sub> aqueous solution electron mediator under visible light irradiation <sup>a</sup>

| Entry | Electron mediator                      | [Ru(dpbpy)]<br>content (wt%) | Amount of products (μmol) |                       |                                         |
|-------|----------------------------------------|------------------------------|---------------------------|-----------------------|-----------------------------------------|
|       |                                        |                              | H <sub>2</sub>            | CO (TON) <sup>b</sup> | HCOO <sup>-</sup><br>(TON) <sup>b</sup> |
| S1    | none                                   | 0.00                         | 0.19                      | 0.01                  | 0.01                                    |
| S2    | none                                   | 0.03                         | 0.66 (80)                 | 0.13(22)              | 0.27(45)                                |
| S3    | [Co(bpy) <sub>3</sub> ] <sup>2+</sup>  | 0.00                         | 0.62                      | 0.29                  | 0.04                                    |
| S4    | [Co(bpy) <sub>3</sub> ] <sup>2+</sup>  | 0.03                         | 0.80 (30)                 | 0.19 (0)              | 0.06 (4)                                |
| S5    | [Co(phen) <sub>3</sub> ] <sup>2+</sup> | 0.00                         | 0.02                      | 0.01                  | 0.01                                    |
| S6    | [Co(phen) <sub>3</sub> ] <sup>2+</sup> | 0.03                         | 0.07 (9)                  | 0.04 (4)              | 0.08 (16)                               |
| S7    | [Co(tpy) <sub>2</sub> ] <sup>2+</sup>  | 0.00                         | 1.72                      | 1.39                  | 0.04                                    |
| S8    | [Co(tpy) <sub>2</sub> ] <sup>2+</sup>  | 0.03                         | 2.80 (184)                | 2.34 (161)            | 0.91 (147)                              |

<sup>a</sup> Photocatalyst: CO<sub>2</sub> reduction photocatalyst 10.7 mg/BiVO<sub>4</sub> 5.3 mg; reactant solution: 4 mL; light source: 500 W Xe lamp with a filter (390 < λ ≤ 750 nm) for 16 h, reactor: Pyrex test tube (8 mL).

<sup>b</sup> TON calculated based on the amount of [Ru(dpbpy)] after detection of the HCOOH or CO amount without [Ru(dpbpy)].

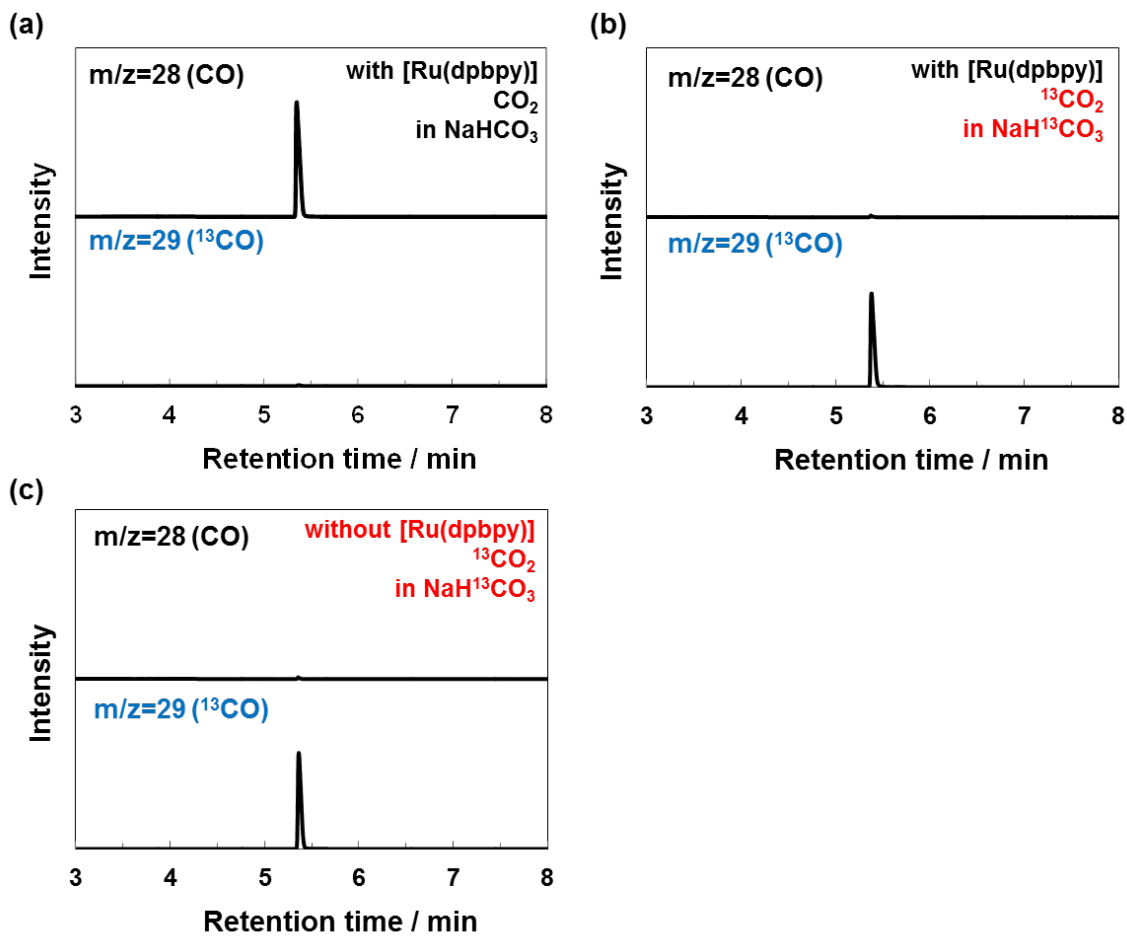

**Fig. S5** GC-MS chromatograms of the gas products for (a)  $\text{CO}_2$  and (b)  $^{13}\text{CO}_2$  photoreduction using the  $[\text{Ru}(\text{dpbbpy})]/(\text{CuGa})_{0.3}\text{Zn}_{1.4}\text{S}_2$ - $([\text{Co}(\text{tpy})_2]^{2+})$ - $(\text{BiVO}_4)$  system, and (c)  $^{13}\text{CO}_2$  reduction using  $(\text{CuGa})_{0.3}\text{Zn}_{1.4}\text{S}_2$ - $([\text{Co}(\text{tpy})_2]^{2+})$ - $(\text{BiVO}_4)$  system (without  $[\text{Ru}(\text{dpbbpy})]$ ) (detected  $m/z=28$  for  $^{12}\text{CO}$  and  $m/z=29$  for  $^{13}\text{CO}$ ). Photocatalyst: 10.7 mg of  $[\text{Ru}(\text{dpbbpy})]/(\text{CuGa})_{0.3}\text{Zn}_{1.4}\text{S}_2$  and 5.3 mg of  $\text{BiVO}_4$ ; solution: 0.02 mmol  $\text{L}^{-1}$   $([\text{Co}(\text{tpy})_2]^{2+})$  containing 0.25 mmol  $\text{L}^{-1}$   $\text{NaHCO}_3$  or  $\text{NaH}^{13}\text{CO}_3$  aqueous solution (4 mL); reactor: Pyrex glass test tube (8 mL); light source: 500 W Xe lamp ( $410 \leq \lambda \leq 750$  nm); irradiation time: 21 h.

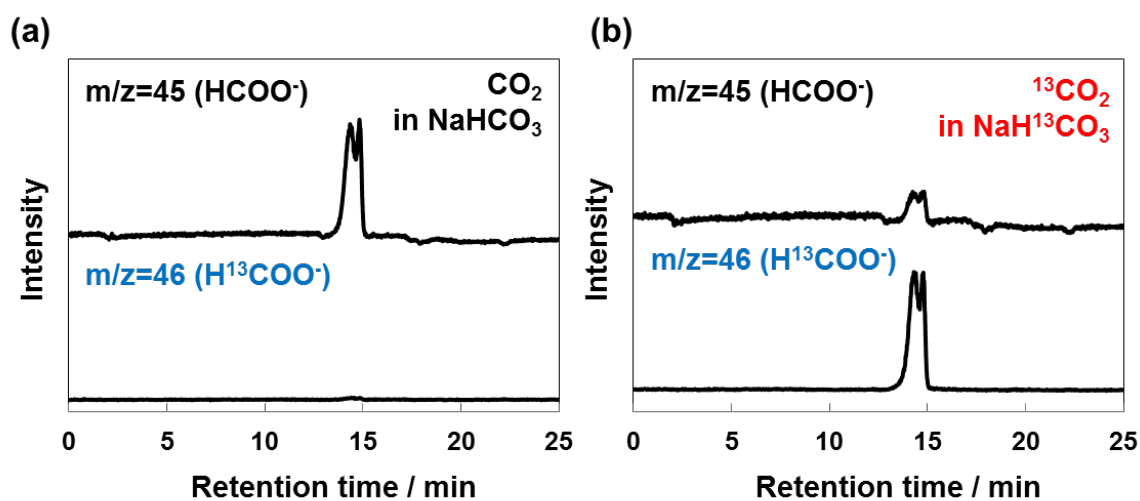

**Fig. S6** IC-TOFMS chromatograms of the products for (a)  $\text{CO}_2$  and (b)  $^{13}\text{CO}_2$  photoreduction using the  $[\text{Ru}(\text{dpbpy})]/(\text{CuGa})_{0.3}\text{Zn}_{1.4}\text{S}_2$ - $[\text{Co}(\text{tpy})_2]^{2+}$ - $(\text{BiVO}_4)$  system (detected  $m/z=45$  for  $\text{H}^{12}\text{COO}^-$  and  $m/z=46$  for  $\text{H}^{13}\text{COO}^-$ ). Photocatalyst:  $[\text{Ru}(\text{dpbpy})]$  (0.03 wt%)/ $(\text{CuGa})_{0.3}\text{Zn}_{1.4}\text{S}_2$  (10.7 mg) and  $\text{BiVO}_4$  (5.3 mg); solution:  $0.02 \text{ mmol L}^{-1}$   $[\text{Co}(\text{tpy})_2]^{2+}$  containing  $0.25 \text{ mmol L}^{-1}$   $\text{NaHCO}_3$  or  $\text{NaH}^{13}\text{CO}_3$  aqueous solution (4 mL); reactor: Pyrex glass test tube (8 mL); light source: 500 W Xe lamp ( $410 \leq \lambda \leq 750 \text{ nm}$ ); irradiation time: 21 h.

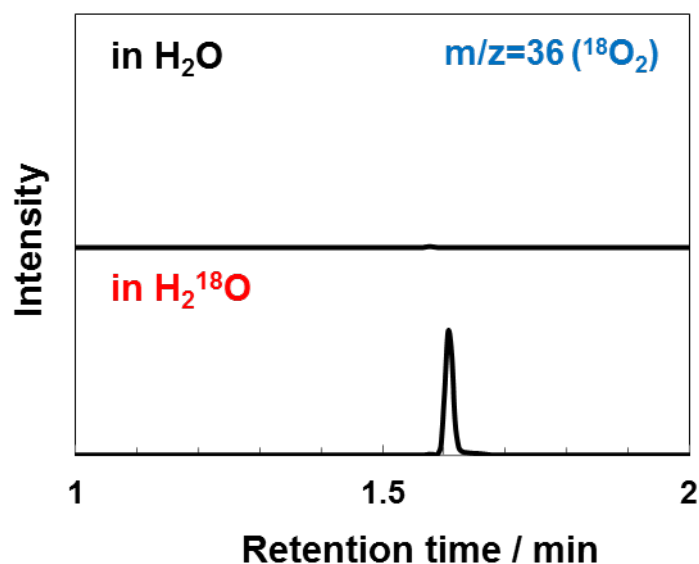

**Fig. S7** GC-MS chromatograms of  $^{18}\text{O}_2$  products ( $m/z=36$ ) for  $\text{CO}_2$  photoreduction over a Z-schematic photocatalyst system consisting of  $[\text{Ru}(\text{dpbpy})]/(\text{CuGa})_{0.3}\text{Zn}_{1.4}\text{S}_2$  and  $\text{BiVO}_4$  photocatalysts, and  $[\text{Co}(\text{tpy})_2]^{3+/2+}$  electron mediator with 0.25 M  $\text{NaHCO}_3$  aqueous solution containing (a)  $\text{H}_2\text{O}$  and (b)  $\text{H}_2^{18}\text{O}$ . Photocatalyst: 8 mg of  $[\text{Ru}(\text{dpbpy})]/(\text{CuGa})_{0.3}\text{Zn}_{1.4}\text{S}_2$  and 8 mg of  $\text{BiVO}_4$ ; solution:  $0.02 \text{ mmol L}^{-1}$   $[(\text{Co}(\text{tpy})_2)]^{2+}$  containing  $0.25 \text{ mmol L}^{-1}$  of  $\text{NaHCO}_3$  aqueous solution (4 mL); reactor: Pyrex glass test tube (8 mL); light source: 500 W Xe lamp ( $410 \leq \lambda \leq 750 \text{ nm}$ ); irradiation time: 22 h.

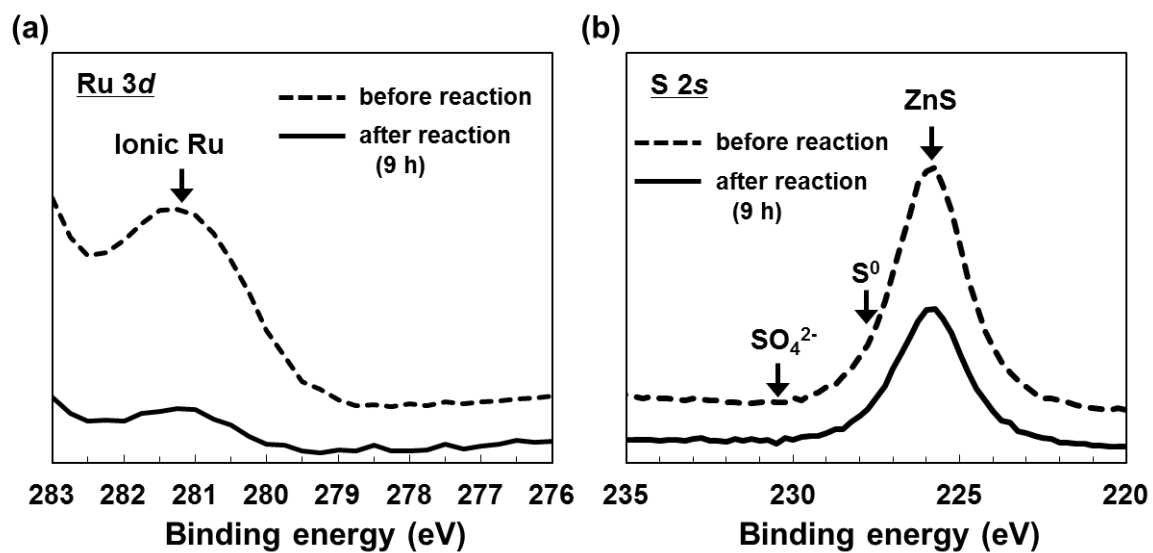

**Fig. S8** XPS (a) Ru 3d and (b) S 2s spectra before ([Ru(dpby)]/(CuGa)<sub>0.3</sub>Zn<sub>1.4</sub>S<sub>2</sub>) and after 9 h Z-schematic ([Ru(dpby)]/(CuGa)<sub>0.3</sub>Zn<sub>1.4</sub>S<sub>2</sub> and BiVO<sub>4</sub>) photocatalytic reaction (evaluation of Figure 1(b)).



**Table S5.** Atomic ratio evaluated from XPS data for Z-schematic CO<sub>2</sub> reduction activity of ([Ru(dpbpy)]/(CuGa)<sub>0.3</sub>Zn<sub>1.4</sub>S<sub>2</sub>)-([Co(tpy)<sub>2</sub>]<sup>3+/2+</sup>)-(BiVO<sub>4</sub>) system before and after photocatalytic reaction for 9 h (evaluation of Figure 1(b))

| Atomic ratio    |        |                |        |
|-----------------|--------|----------------|--------|
| Before reaction |        | After reaction |        |
| Ru/S            | Ru/Zn  | Ru/S           | Ru/Zn  |
| 0.0032          | 0.0044 | 0.0016         | 0.0019 |

## References

1. Kato, T.; Hakari, Y.; Ikeda, S.; Jia, Q.; Iwase, A.; Kudo, A. *J. Phys. Chem. Lett.* **2015**, *6*, 1042-1047.
2. Suzuki, T. M.; Iwase, A.; Tanaka, H.; Sato, S.; Kudo, A.; Morikawa, T. *J. Mater. Chem. A* **2015**, *3*, 13283-13290.
3. Anderson, P. A.; Deacon, G. B.; Haarmann, K. H.; Keene, F. R.; Meyer, T. J.; Reitsma, D. A.; Skelton, B. W.; Strouse, G. F.; Thomas, N. C.; Treadway, J. A.; White, A. H. *Inorg. Chem.* **1995**, *34*, 6145-6157.
4. Suzuki, T. M.; Tanaka, H.; Morikawa, T.; Iwaki, M.; Sato, S.; Saeki, S.; Inoue, M.; Kajino, T.; Motohiro, T. *Chem. Commun.* **2011**, *47*, 8673-8675.
5. Suzuki, T. M.; Takayama, T.; Sato, S.; Iwase, A.; Kudo, A.; Morikawa, T. *Appl. Catal., B* **2018**, *224*, 572-578.
6. Sato, S.; Arai, T.; Morikawa, T.; Uemura, K.; Suzuki, T. M.; Tanaka, H.; Kajino, T. *J. Am. Chem. Soc.* **2011**, *133*, 15240-15243.
7. Iwase, A.; Yoshino, S.; Takayama, T.; Ng, Y. H.; Amal, R.; Kudo, A. *J. Am. Chem. Soc.* **2016**, *138*, 10260-10264.
8. Takayama, T.; Sato, K.; Fujimura, T.; Kojima, Y.; Iwase, A.; Kudo, A. *Faraday Discuss.* **2017**, *198*, 397-407.
